# Supplementary material for: Solvent-assisted construction of diverse Mg-TDC coordination polymers
Source: Royal Society of Chemistry journal article supplement (doi:10.1039/c4ce02288b), 2014-12-16
Supplement: c4ce02288b1.pdf [file c4ce02288b1.pdf]

## Supporting Information

### Solvent-assisted Construction of Diverse Mg-TDC

### Coordination Polymers

Ying Song,<sup>†,‡</sup> Mei-Ling Feng,<sup>†</sup> Zhao-Feng Wu<sup>†</sup> and Xiao-Ying Huang<sup>\*,†</sup>

<sup>†</sup>State Key Laboratory of Structural Chemistry, Fujian Institute of Research on the structure of Matter, Chinese Academy of Sciences, Fuzhou, Fujian 350002, P.R. China

<sup>‡</sup>University of Chinese Academy of Sciences, Beijing, 100049, P.R. China

\*Corresponding author, E-mail: [xyhuang@fjirsm.ac.cn](mailto:xyhuang@fjirsm.ac.cn). Fax: (+86) 591-83793727

**Table S1.** Temperature and solvent effects on the syntheses of compounds **1-4** under solvothermal conditions.

| Number   | Metal source                                                      | Solvent                                        | Temperature         | Results                 |
|----------|-------------------------------------------------------------------|------------------------------------------------|---------------------|-------------------------|
| <b>1</b> |                                                                   |                                                |                     |                         |
| 1-1      | Mg(NO <sub>3</sub> ) <sub>2</sub> ·6H <sub>2</sub> O <sup>a</sup> | 3mL EG <sup>c</sup> + 3mL acetonitrile         | 150 °C <sup>b</sup> | <b>1</b>                |
| 1-2      | Mg(NO <sub>3</sub> ) <sub>2</sub> ·6H <sub>2</sub> O              | 3mL EG + 3mL acetonitrile                      | 160 °C              | <b>1</b>                |
| 1-3      | Mg(NO <sub>3</sub> ) <sub>2</sub> ·6H <sub>2</sub> O              | 3mL EG                                         | 150 °C              | Solution                |
| 1-4      | Mg(NO <sub>3</sub> ) <sub>2</sub> ·6H <sub>2</sub> O              | 3mL EG + 3mL acetone                           | 150 °C              | <b>1</b>                |
| 1-5      | Mg(NO <sub>3</sub> ) <sub>2</sub> ·6H <sub>2</sub> O              | 3mL EG + 3mL methanol                          | 150 °C              | <b>1</b>                |
| 1-6      | Mg(NO <sub>3</sub> ) <sub>2</sub> ·6H <sub>2</sub> O              | 3mL EG + 3mL ethanol                           | 160 °C              | <b>1</b>                |
| 1-7      | MgCl <sub>2</sub> ·6H <sub>2</sub> O                              | 3mL EG + 3mL acetonitrile                      | 150 °C              | Unknown solids          |
| 1-8      | MgCl <sub>2</sub> ·6H <sub>2</sub> O                              | 3mL EG + 3mL acetonitrile                      | 160 °C              | <b>1</b>                |
| <b>2</b> |                                                                   |                                                |                     |                         |
| 2-1      | Mg(NO <sub>3</sub> ) <sub>2</sub> ·6H <sub>2</sub> O              | 4mL DMSO + 2mL methanol                        | 120 °C              | Unknown crystals        |
| 2-2      | Mg(NO <sub>3</sub> ) <sub>2</sub> ·6H <sub>2</sub> O              | 4mL DMSO + 2mL methanol                        | 140 °C              | <b>2</b>                |
| 2-3      | Mg(NO <sub>3</sub> ) <sub>2</sub> ·6H <sub>2</sub> O              | 4mL DMSO + 2mL methanol                        | 150 °C              | <b>2</b>                |
| 2-4      | Mg(NO <sub>3</sub> ) <sub>2</sub> ·6H <sub>2</sub> O              | 4mL DMSO + 2mL methanol                        | 160 °C              | Unknown powders         |
| 2-5      | Mg(NO <sub>3</sub> ) <sub>2</sub> ·6H <sub>2</sub> O              | 4mL DMSO + 2mL methanol                        | 170 °C              | MgSO <sub>4</sub>       |
| 2-6      | Mg(NO <sub>3</sub> ) <sub>2</sub> ·6H <sub>2</sub> O              | 4mL DMSO                                       | 150 °C              | <b>2</b>                |
| 2-7      | Mg(NO <sub>3</sub> ) <sub>2</sub> ·6H <sub>2</sub> O              | 4mL DMSO + 2mL ethanol                         | 150 °C              | <b>2</b>                |
| 2-8      | Mg(NO <sub>3</sub> ) <sub>2</sub> ·6H <sub>2</sub> O              | 4mL DMSO + 2mL acetonitrile                    | 150 °C              | <b>2</b>                |
| 2-9      | Mg(NO <sub>3</sub> ) <sub>2</sub> ·6H <sub>2</sub> O              | 4mL DMSO + 2mL DMF                             | 150 °C              | <b>2</b>                |
| 2-10     | Mg(NO <sub>3</sub> ) <sub>2</sub> ·6H <sub>2</sub> O              | 4mL DMSO + 2mL benzene                         | 150 °C              | <b>2</b>                |
| 2-11     | Mg(NO <sub>3</sub> ) <sub>2</sub> ·6H <sub>2</sub> O              | 4mL DMSO + 1mL DMF + 1mL H <sub>2</sub> O      | 120 °C              | <b>2</b>                |
| <b>3</b> |                                                                   |                                                |                     |                         |
| 3-1      | Mg(NO <sub>3</sub> ) <sub>2</sub> ·6H <sub>2</sub> O              | 4mL DMA                                        | 120 °C              | <b>3</b>                |
| 3-2      | Mg(NO <sub>3</sub> ) <sub>2</sub> ·6H <sub>2</sub> O              | 4mL DMA                                        | 140 °C              | <b>3</b>                |
| 3-3      | Mg(NO <sub>3</sub> ) <sub>2</sub> ·6H <sub>2</sub> O              | 4mL DMA                                        | 150 °C              | <b>3</b>                |
| 3-4      | Mg(NO <sub>3</sub> ) <sub>2</sub> ·6H <sub>2</sub> O              | 4mL DMA                                        | 160 °C              | Unknown crystals        |
| 3-5      | Mg(NO <sub>3</sub> ) <sub>2</sub> ·6H <sub>2</sub> O              | 4mL DMA + 0.1 mL H <sub>2</sub> O              | 150 °C              | <b>3</b>                |
| 3-6      | Mg(NO <sub>3</sub> ) <sub>2</sub> ·6H <sub>2</sub> O              | 4mL DMA + 0.1mL methanol                       | 150 °C              | <b>3</b>                |
| <b>4</b> |                                                                   |                                                |                     |                         |
| 4-1      | Mg(NO <sub>3</sub> ) <sub>2</sub> ·6H <sub>2</sub> O              | 5mL DMF + 1mL ethanol + 0.5mL H <sub>2</sub> O | 100 °C              | <b>4</b>                |
| 4-2      | Mg(NO <sub>3</sub> ) <sub>2</sub> ·6H <sub>2</sub> O              | 5mL DMF + 1mL ethanol + 0.5mL H <sub>2</sub> O | 120 °C              | Mg-formate <sup>d</sup> |
| 4-3      | Mg(NO <sub>3</sub> ) <sub>2</sub> ·6H <sub>2</sub> O              | 5mL DMF + 1mL ethanol + 0.5mL H <sub>2</sub> O | 130 °C              | Mg-formate              |

|     |                                                      |                                                |        |                |
|-----|------------------------------------------------------|------------------------------------------------|--------|----------------|
| 4-4 | Mg(NO <sub>3</sub> ) <sub>2</sub> ·6H <sub>2</sub> O | 5mL DMF + 1mL ethanol + 0.5mL H <sub>2</sub> O | 140 °C | Mg-formate     |
| 4-5 | Mg(NO <sub>3</sub> ) <sub>2</sub> ·6H <sub>2</sub> O | 5mL DMF + 1mL ethanol + 0.5mL H <sub>2</sub> O | 160 °C | Mg-formate     |
| 4-6 | Mg(NO <sub>3</sub> ) <sub>2</sub> ·6H <sub>2</sub> O | 5mL DMF + 1mL ethanol + 0.1mL H <sub>2</sub> O | 100 °C | <b>4</b>       |
| 4-7 | Mg(NO <sub>3</sub> ) <sub>2</sub> ·6H <sub>2</sub> O | 5mL DMF + 1mL ethanol                          | 100 °C | Unknown solids |

Noting that:

[a] The reaction amount of Mg(NO<sub>3</sub>)<sub>2</sub>·6H<sub>2</sub>O was 1 mmol in **1**, **2** and **4** while it was 0.39 mmol in **3** and that of H<sub>2</sub>TDC was 1.5 mmol in **1**, **2** and **4** while it was 0.39 mmol in **3**.

[b] The reaction time was 3 days for **1**, **2** and **3** while it was 3.5 days for **4**; for obtaining crystals with large size, programmed cooling process was needed for **3** and **4**.

[c] H<sub>2</sub>TDC = 2, 5-thiophenedicarboxylic acid, EG = ethylene glycol, DMSO = dimethyl sulfoxide, DMA = *N, N'*-dimethyl-acetamide, DMF = *N, N'*-dimethyl-formamide.

[d] Chemical formula, (Me<sub>2</sub>NH<sub>2</sub>)[Mg(HCOO)<sub>3</sub>]<sup>1</sup>.

#### References:

- 1 A. Rossin, A. Ienco, F. Costantino, T. Montini, B. Di Credico, M. Caporali, L. Gonsalvi, P. Fornasiero and M. Peruzzini, *Cryst. Growth Des.*, 2008, **8**, 3302-3308.

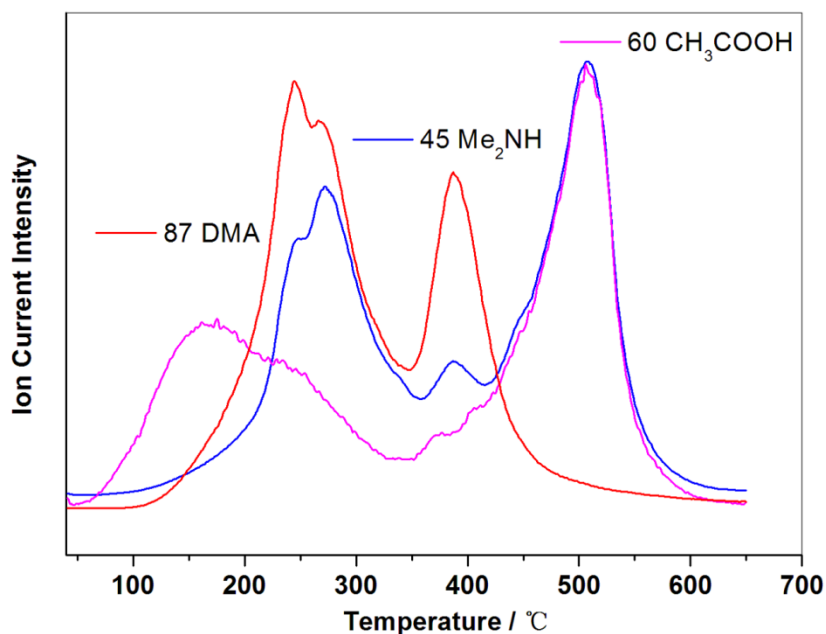

**Fig. S1** The TGA-MS characterizations of compound **3** verified the existence of DMA, [Me<sub>2</sub>NH<sub>2</sub>]<sup>+</sup> and CH<sub>3</sub>COO<sup>-</sup> in the structure.

**More structural figures.**

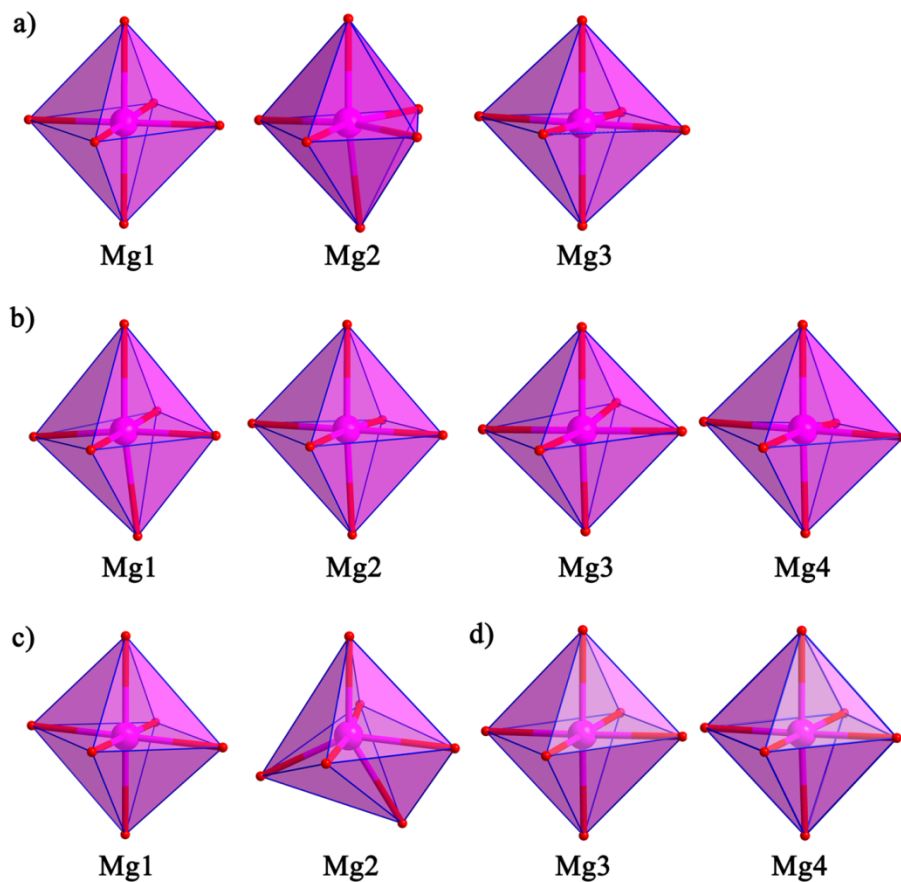

**Fig. S2** The [MgO<sub>6</sub>] polyhedra in the structures of **1** (a), **2** (b), **3** (c) and **4** (d).

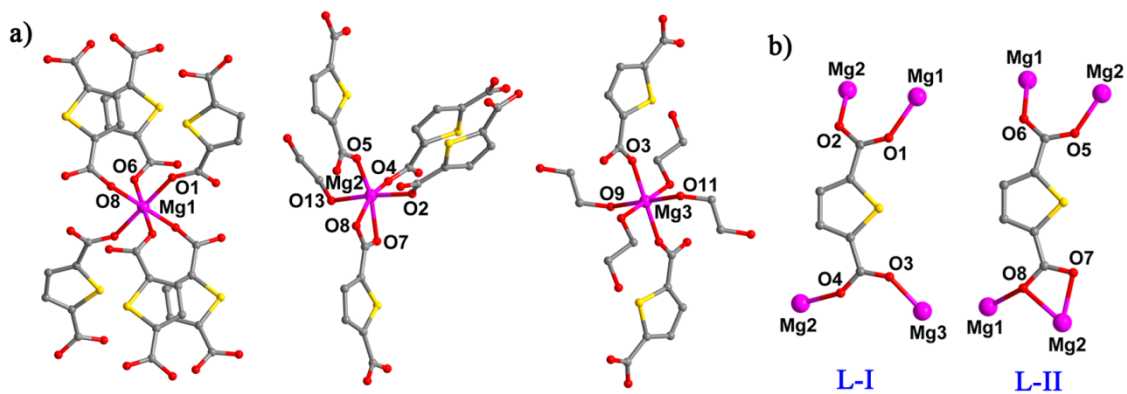

**Fig. S3** The coordination environments of independent Mg<sup>2+</sup> ions (a) and TDC<sup>2-</sup> ligands (b) in **1**.

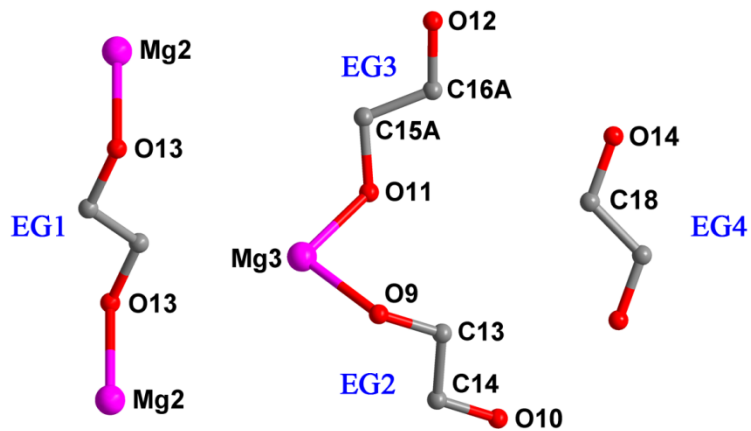

**Fig. S4** The four independent EG molecules existing in the structure of **1**.

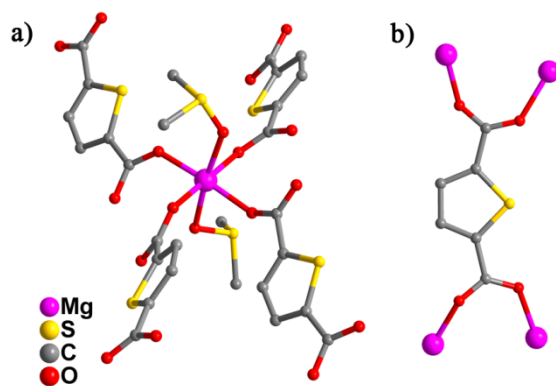

**Fig. S5** The similar coordination modes of four independent  $\text{Mg}^{2+}$  ions (a) and four unique  $\text{TDC}^{2-}$  ligands (b) in **2**.

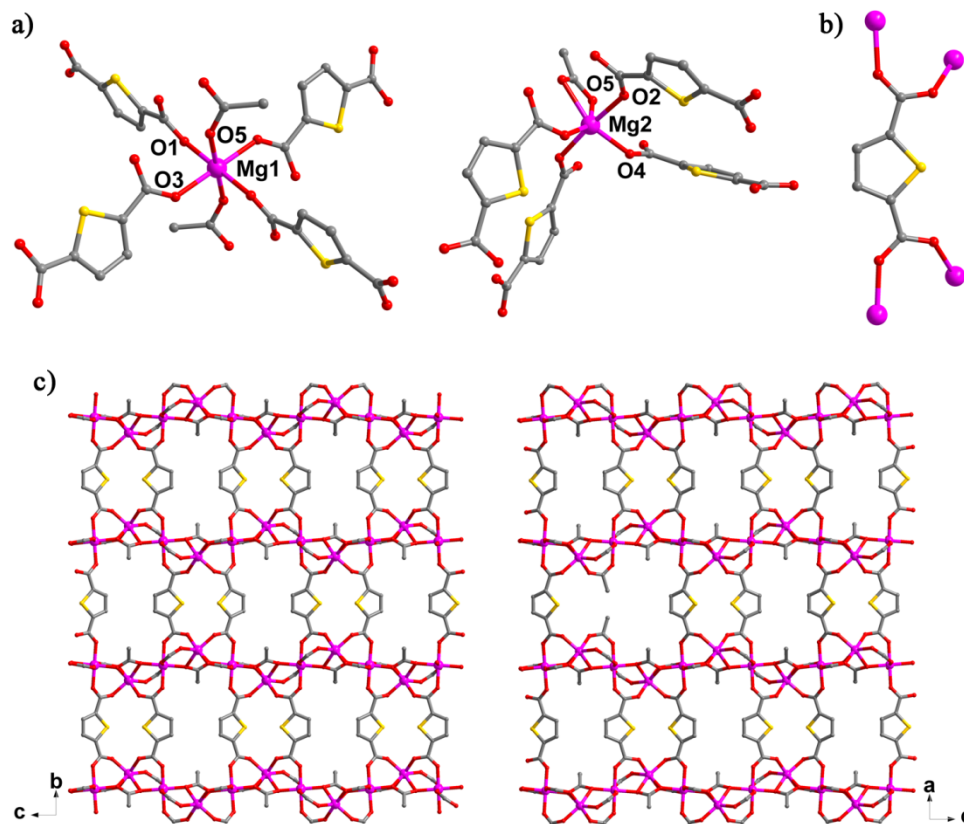

**Fig. S6** (a) and (b) show the coordination modes of two unique Mg<sup>2+</sup> centers and TDC<sup>2-</sup> ligand, respectively. (c) View of the layers formed by linking TDC<sup>2-</sup> ligands and [Mg-AC] chains along the *bc* and *ac* planes, respectively in **3**.

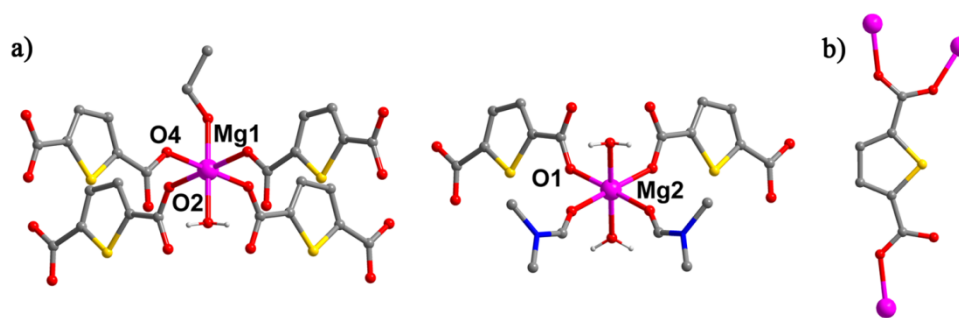

**Fig. S7** The coordination environment of two unique Mg<sup>2+</sup> centers (a) and TDC<sup>2-</sup> ligand (b) in **4**.

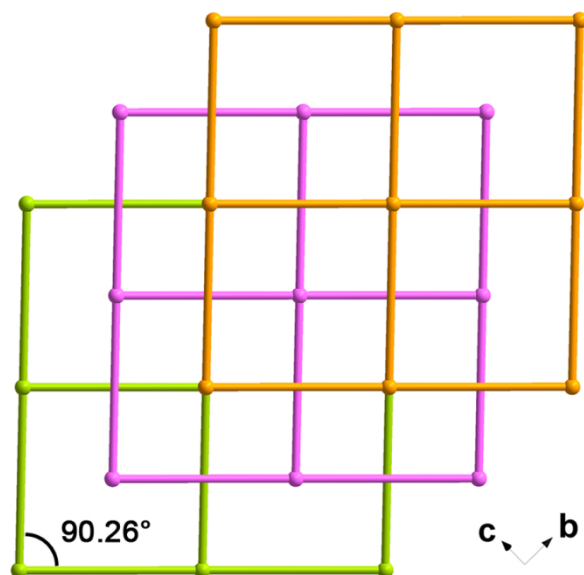

**Fig. S8** View of the simplified rhombic topology in **4**.

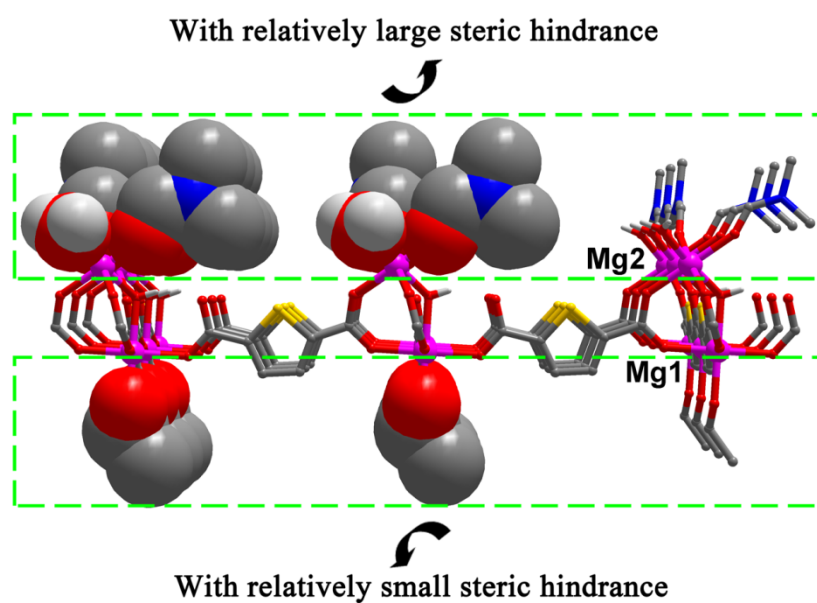

**Fig. S9** View of a layer of **4** showing the difference of steric hindrance in both sides of a layer in **4**. Clearly, the side with two DMF and one H<sub>2</sub>O molecule coordinated to Mg2 has larger steric hindrance than the other side with one ethanol molecule binding to Mg1.

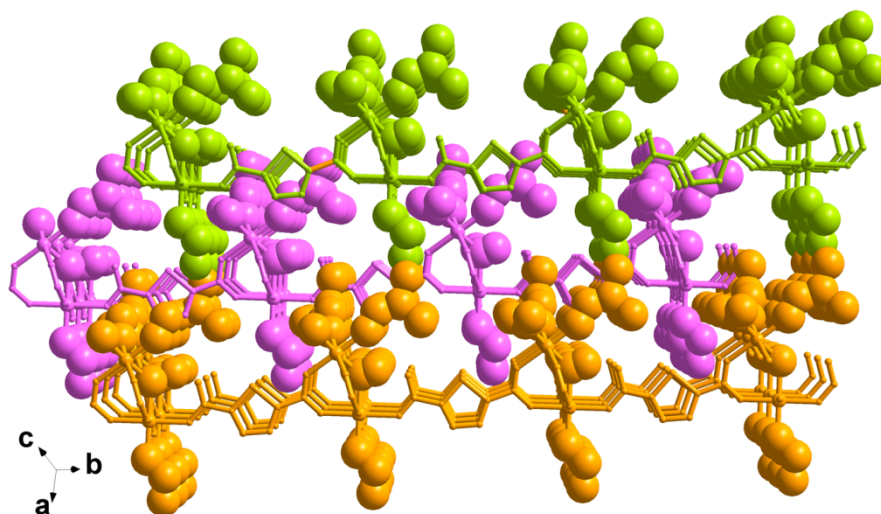

**Fig. S10** View of the packing diagram of **4** showing the “head to tail” packing favourable for the maximal filling of the void space. Solvent molecules are drawn in a space-filling mode. The free DMF molecules are omitted for clarity.

**CIE chromaticity diagram.**

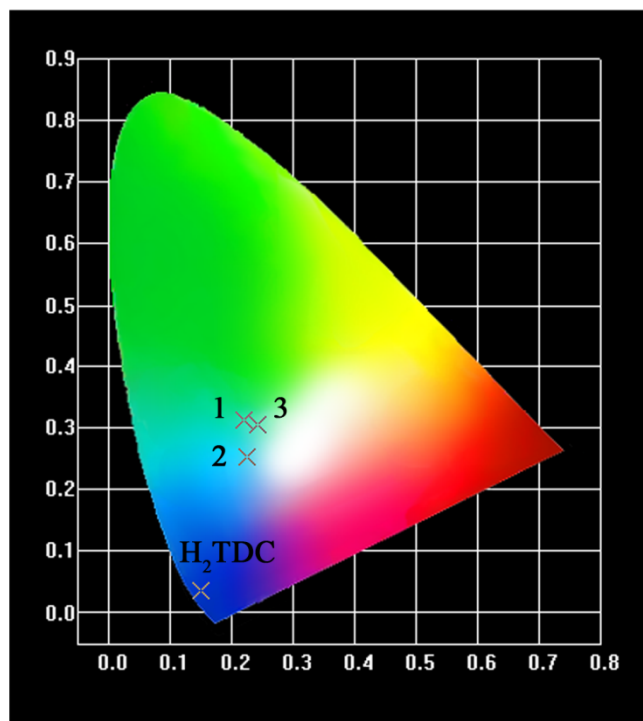

**Fig. S11** CIE chromaticity diagram of the emission colors of compounds **1-3** and H<sub>2</sub>TDC ligand.



### SHG characterization.

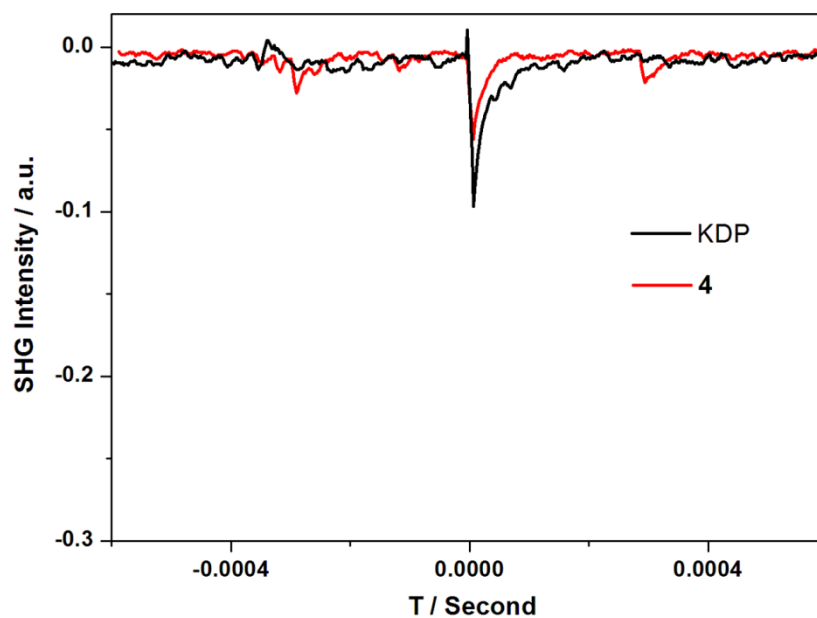

**Fig. S12** Oscilloscope traces of the SHG signals of 4 and KDP at the same particle size.

### IR Spectra.

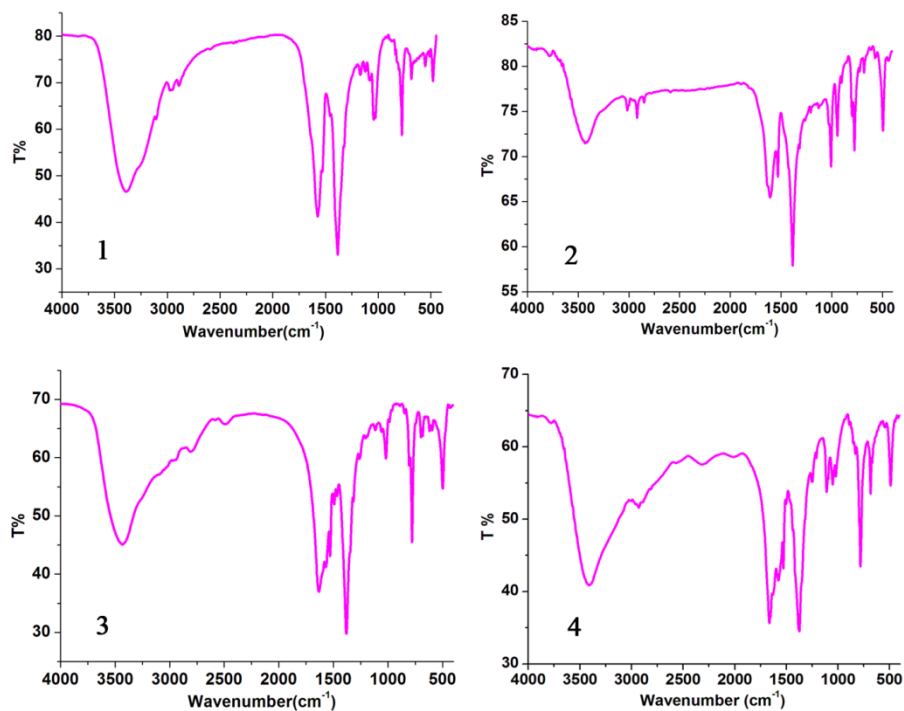

**Fig. S13** FT-IR spectra of compounds 1-4.
